# Supplementary material for: Bio-derived solvent-based automated dispersive liquid–liquid microextraction for pretreatment of diamide insecticides in environmental water samples
Source: Royal Society of Chemistry journal article supplement (doi:10.1039/d4gc04467c), 2024-11-07
Supplement: d4gc04467c2.pdf [file d4gc04467c2.pdf]

**Bio-derived solvent-based automated dispersive liquid-liquid microextraction for  
pretreatment of diamide insecticides in environmental water samples**

Jin Liu <sup>a,b</sup>, Yuxin Wang <sup>a,b</sup>, Rui Song <sup>b</sup>, Yukun Yang <sup>c</sup>, Li Li <sup>b,\*</sup>, Xu Jing <sup>a,\*</sup>

<sup>a</sup> College of Food Science and Engineering, Shanxi Agricultural University,  
Taigu, Shanxi 030801, China;

<sup>b</sup> Shanxi Key Laboratory of Integrated Pest Management in Agriculture, College  
of Plant Protection, Shanxi Agricultural University, Taiyuan, Shanxi 030031, China;

<sup>c</sup> College of Life Sciences, Shanxi University, Taiyuan, Shanxi, 030006, China.

\*Corresponding authors:

Li Li, E-mail: [sxaulili@sxau.edu.cn](mailto:sxaulili@sxau.edu.cn).

Xu Jing, E-mail: [x.jing@vip.163.com](mailto:x.jing@vip.163.com).

Number of pages: 14

Number of tables: 9

Number of figures: 3

A Waters C<sub>18</sub> column (2.1 × 100 mm, 1.7 μm) was used at 40 °C with a flow rate of 0.3 mL min<sup>-1</sup> and an injection volume of 2 μL. The gradient elution conditions are detailed in Table S1. The ion source conditions included a source temperature of 550 °C and curtain gas, ion source gas 1, and ion source gas 2 delivered at 40, 55, and 55 psi, respectively. The optimized MS/MS parameters for chlorantraniliprole and flubendiamide under multiple reaction monitoring (MRM) conditions are presented in Table S2.

**Table S1.** The UHPLC-MS/MS gradient elution conditions.

| Time (min) | Flow (mL<br>min <sup>-1</sup> ) | Mobile Phase A (%) | Mobile Phase B (%) |
|------------|---------------------------------|--------------------|--------------------|
| 0          | 0.3                             | 95                 | 5                  |
| 0.5        | 0.3                             | 80                 | 20                 |
| 0.6        | 0.3                             | 60                 | 40                 |
| 1.5        | 0.3                             | 40                 | 60                 |
| 1.6        | 0.3                             | 20                 | 80                 |
| 2.5        | 0.3                             | 5                  | 95                 |
| 4.0        | 0.3                             | 5                  | 95                 |
| 4.1        | 0.3                             | 95                 | 5                  |

Mobile Phase A: 0.01% formic acid and 2 mmol L<sup>-1</sup> ammonium formate mixed in water.

Mobile Phase B: Methanol.

**Table S2.** MS/MS optimized parameters with the multiple reaction monitoring conditions.

| Diamide<br>Insecticide | Polarity | Spray<br>Voltage (V) | Settling<br>Time (ms) | Pause<br>Time (ms) | Precursor<br>Ion (m/z) | Qualifier<br>Ion (m/z) | Dwell<br>Time (ms) | Declustering<br>Potential (V) | Collision<br>Energy (eV) |
|------------------------|----------|----------------------|-----------------------|--------------------|------------------------|------------------------|--------------------|-------------------------------|--------------------------|
| Chlorantraniliprole    | Positive | 5500                 | 50                    | 5                  | 324                    | 262 (Q)                | 30                 | 63                            | 28                       |
|                        |          |                      |                       |                    |                        | 242 (q)                |                    |                               | 37                       |
| Flubendiamide          | Negative | 4500                 | 50                    | 5                  | 382                    | 342 (Q)                | 30                 | 92                            | 30                       |
|                        |          |                      |                       |                    |                        | 314 (q)                |                    |                               | 37                       |

**Table S3.** The Log P of the two diamide insecticides and four extractants.

| Diamide Insecticide & Extractant | Log P |
|----------------------------------|-------|
| Chlorantraniliprole              | 2.9   |
| Flubendiamide                    | 4.1   |
| Eucalyptol                       | 3.4   |
| Guaiacol                         | 1.3   |
| Methyl laurate                   | 5.4   |
| Methyl linoleate                 | 7.6   |

**Table S4.** The toxicity information of  $\gamma$ -valerolactone.

|    |                                                   | $\gamma$ -valerolactone                                                                                                                                  |
|----|---------------------------------------------------|----------------------------------------------------------------------------------------------------------------------------------------------------------|
| 1  | Acute toxicity                                    | LD <sub>50</sub> = 8800mg kg <sup>-1</sup> (rat)                                                                                                         |
| 2  | Skin irritation or corrosion                      | Causes mild irritant effect                                                                                                                              |
| 3  | Eye irritation or corrosion                       | May cause irritation                                                                                                                                     |
| 4  | Skin sensitization                                | No sensitizing effects known                                                                                                                             |
| 5  | Germ cell mutagenicity                            | No effects known                                                                                                                                         |
| 6  | Carcinogenicity                                   | No classification data on carcinogenic properties of this material is available from the EPA, IARC, NTP, OSHA or ACGIH                                   |
| 7  | Developmental toxicity and reproductive toxicity  | Developmental toxicity:<br>NOAEL = 1000 mg kg <sup>-1</sup> day <sup>-1</sup><br>Reproductive toxicity:<br>No NOAEL available. Exposure is below the TTC |
| 8  | Specific target organ toxicity -single exposure   | No effects known                                                                                                                                         |
| 9  | Specific target organ toxicity -repeated exposure | No effects known                                                                                                                                         |
| 10 | Aspiration hazard                                 | No effects known                                                                                                                                         |

**Table S5.** The toxicity information of eucalyptol.

|    |                                                   | Eucalyptol                                                                                                                                                            |
|----|---------------------------------------------------|-----------------------------------------------------------------------------------------------------------------------------------------------------------------------|
| 1  | Acute toxicity                                    | LD <sub>50</sub> = 2480 mg kg <sup>-1</sup> (rat)                                                                                                                     |
| 2  | Skin irritation or corrosion                      | Irritant to skin and mucous membranes                                                                                                                                 |
| 3  | Eye irritation or corrosion                       | Irritating effect                                                                                                                                                     |
| 4  | Skin sensitization                                | No sensitizing effects known                                                                                                                                          |
| 5  | Germ cell mutagenicity                            | No effects known                                                                                                                                                      |
| 6  | Carcinogenicity                                   | No classification data on carcinogenic properties of this material is available from the EPA, IARC, NTP, OSHA or ACGIH                                                |
| 7  | Developmental toxicity and reproductive toxicity  | Developmental toxicity:<br>NOAEL = 300 mg kg <sup>-1</sup> day <sup>-1</sup><br>Reproductive toxicity:<br>Fertility NOAEL = 600 mg kg <sup>-1</sup> day <sup>-1</sup> |
| 8  | Specific target organ toxicity -single exposure   | No effects known                                                                                                                                                      |
| 9  | Specific target organ toxicity -repeated exposure | No effects known                                                                                                                                                      |
| 10 | Aspiration hazard                                 | No effects known                                                                                                                                                      |

**Table S6.** Detailed indicators used to evaluate the environmental hazards of the QuEChERS.

|    |                                 | QuEChERS                                                                                                                                                                                                                                                                                                                       |
|----|---------------------------------|--------------------------------------------------------------------------------------------------------------------------------------------------------------------------------------------------------------------------------------------------------------------------------------------------------------------------------|
| 1  | Acidification                   | N <sub>2</sub> (LC-MS/MS)                                                                                                                                                                                                                                                                                                      |
| 2  | Persistent organics             | No                                                                                                                                                                                                                                                                                                                             |
| 3  | Bio-accumulation                | No                                                                                                                                                                                                                                                                                                                             |
| 4  | Ecotoxicity                     | Acetonitrile: Fish LC <sub>50</sub> = 1640 mg L <sup>-1</sup><br>Methanol: <i>Pimephales promelas</i> LC <sub>50</sub> > 10000 mg L <sup>-1</sup><br>Acetic acid: <i>Oncorhynchus mykiss</i> LC <sub>50</sub> > 1000 mg L <sup>-1</sup><br>Ammonium hydroxide: <i>Daphnia magna</i> LC <sub>50</sub> = 25.4 mg L <sup>-1</sup> |
| 5  | Energy usage/<br>Global warming | A small amount of energy consumption (vortex for 4min, and centrifugation for 15min)<br>No powerful greenhouse gases                                                                                                                                                                                                           |
| 6  | Eutrophication                  | Nitrogen element in acetonitrile, PSA, and ammonium hydroxide                                                                                                                                                                                                                                                                  |
| 7  | Flammability                    | Acetonitrile, methanol, and acetic acid                                                                                                                                                                                                                                                                                        |
| 8  | Human toxicity                  | Acetonitrile: LD <sub>50</sub> = 2730 mg kg <sup>-1</sup> (rat)<br>Methanol: LD <sub>50</sub> = 5628 mg kg <sup>-1</sup> (rat)<br>Acetic acid: LD <sub>50</sub> = 4960 mg kg <sup>-1</sup> (rat)<br>Ammonium hydroxide: LD <sub>50</sub> = 350 mg kg <sup>-1</sup> (rat)                                                       |
| 9  | Human carcinogenicity           | Acetonitrile, methanol, and ammonium hydroxide                                                                                                                                                                                                                                                                                 |
| 10 | Ozone depletion                 | Reagents without chlorine, bromine, and fluorine                                                                                                                                                                                                                                                                               |
| 11 | Resource depletion              | No relevant reagents used                                                                                                                                                                                                                                                                                                      |
| 12 | Smog formation                  | No organic gas emissions                                                                                                                                                                                                                                                                                                       |
| 13 | Mass of waste                   | Sample: 10 mL<br>Acetonitrile: 15 mL<br>Acetic acid: 0.1 mL<br>Ammonium hydroxide: 0.1 mL<br>MgSO <sub>4</sub> : 5.2 g<br>NaCl: 1 g<br>PSA: 0.4 g<br>C <sub>18</sub> : 0.4g<br>Mobile phase: 5.25 mL<br><br>Total: 37.45 mL                                                                                                    |
| 14 | water consumption               | Sample: 10 mL<br>Mobile phase: ≈ 2.6 mL<br><br>Total: 12.6 mL                                                                                                                                                                                                                                                                  |



**Table S7.** Detailed indicators used to evaluate the environmental hazards of the MSPE.

|    |                                 | MSPE                                                                                     |
|----|---------------------------------|------------------------------------------------------------------------------------------|
| 1  | Acidification                   | No                                                                                       |
| 2  | Persistent organics             | No                                                                                       |
| 3  | Bio-accumulation                | No                                                                                       |
| 4  | Ecotoxicity                     | Acetonitrile: Fish LC <sub>50</sub> = 1640 mg L <sup>-1</sup>                            |
| 5  | Energy usage/<br>Global warming | A small amount of energy consumption (vortex for 15 min)<br>No powerful greenhouse gases |
|    |                                 |                                                                                          |
| 6  | Eutrophication                  | Nitrogen element in acetonitrile                                                         |
| 7  | Flammability                    | Acetonitrile                                                                             |
| 8  | Human toxicity                  | Acetonitrile: LD <sub>50</sub> = 2730 mg kg <sup>-1</sup> (rat)                          |
| 9  | Human carcinogenicity           | Acetonitrile                                                                             |
| 10 | Ozone depletion                 | Reagents without chlorine, bromine, and fluorine                                         |
| 11 | Resource depletion              | No relevant reagents used                                                                |
| 12 | Smog formation                  | No organic gas emissions                                                                 |
| 13 | Mass of waste                   | Sample: 7 mL                                                                             |
|    |                                 | Acetonitrile: 1 mL                                                                       |
|    |                                 | IL-MMIPs: 0.005 g                                                                        |
|    |                                 | Mobile phase: 7 mL                                                                       |
|    |                                 | Total: 15.005 mL                                                                         |
| 14 | water consumption               | Sample: 7 mL                                                                             |
|    |                                 | Mobile phase: 1.75 mL                                                                    |
|    |                                 | Total: 8.75 mL                                                                           |

**Table S8.** Detailed indicators used to evaluate the environmental hazards of the dSPE.

|    |                       | dSPE                                                                       |
|----|-----------------------|----------------------------------------------------------------------------|
| 1  | Acidification         | N <sub>2</sub> (LC-MS/MS)                                                  |
| 2  | Persistent organics   | No                                                                         |
| 3  | Bio-accumulation      | No                                                                         |
| 4  | Ecotoxicity           | Acetonitrile: Fish LC <sub>50</sub> = 1640 mg L <sup>-1</sup>              |
| 5  | Energy usage/         | A medium amount of energy consumption (ultrasonic,                         |
|    | Global warming        | centrifuge, vacuum evaporator)<br>No powerful greenhouse gases             |
| 6  | Eutrophication        | Nitrogen element in acetonitrile                                           |
| 7  | Flammability          | Acetonitrile                                                               |
| 8  | Human toxicity        | Acetonitrile: LD <sub>50</sub> = 2730 mg kg <sup>-1</sup> (rat)            |
| 9  | Human carcinogenicity | Acetonitrile                                                               |
| 10 | Ozone depletion       | Reagents without chlorine, bromine, and fluorine                           |
| 11 | Resource depletion    | No relevant reagents used                                                  |
| 12 | Smog formation        | Evaporation of 0.2 mL acetonitrile<br>Acetonitrile: 0.2 mL<br>Sample: 1 mL |
| 13 | Mass of waste         | MOF: 0.002 g<br>Mobile phase: 1.6 mL<br>Total: 2.802 mL                    |
|    |                       | Sample: 1 mL<br>Mobile phase: 0.534 mL<br>Total: 1.534 mL                  |

**Table S9.** Detailed indicators used to evaluate the environmental hazards of the SPE.

|    |                                 | SPE                                                                                                                           |
|----|---------------------------------|-------------------------------------------------------------------------------------------------------------------------------|
| 1  | Acidification                   | N <sub>2</sub> (UHPLC-MS/MS and gas used for drying)                                                                          |
| 2  | Persistent organics             | No                                                                                                                            |
| 3  | Bio-accumulation                | No                                                                                                                            |
| 4  | Ecotoxicity                     | Methanol: <i>Pimephales promelas</i> LC <sub>50</sub> > 10000 mg L <sup>-1</sup>                                              |
| 5  | Energy usage/<br>Global warming | A high amount of energy consumption (dried under vacuum for 20 min, 40 °C water bath with a gentle stream of N <sub>2</sub> ) |
|    |                                 | No powerful greenhouse gases                                                                                                  |
| 6  | Eutrophication                  | Nitrogen element in N <sub>2</sub> and the Oasis HLB                                                                          |
| 7  | Flammability                    | Methanol                                                                                                                      |
| 8  | Human toxicity                  | Methanol: LD <sub>50</sub> = 5628 mg kg <sup>-1</sup> (rat)                                                                   |
|    |                                 | Oasis HLB: Divinylbenzene: LD <sub>50</sub> = 4040 mg kg <sup>-1</sup> (rat)                                                  |
| 9  | Human carcinogenicity           | Divinylbenzene and methanol                                                                                                   |
| 10 | Ozone depletion                 | Reagents without chlorine, bromine, and fluorine                                                                              |
| 11 | Resource depletion              | No relevant reagents used                                                                                                     |
| 12 | Smog formation                  | Evaporation of 4 mL methanol                                                                                                  |
|    |                                 | Sample: 60 mL                                                                                                                 |
| 13 | Mass of waste                   | Methanol: 9.3 mL                                                                                                              |
|    |                                 | Ultrapure water: 68.3 mL                                                                                                      |
|    |                                 | Oasis HLB: 0.06 g                                                                                                             |
|    |                                 | Mobile phase: 10 mL                                                                                                           |
|    |                                 | Total: 147.66 mL                                                                                                              |
| 14 | Water consumption               | Sample: 60 mL                                                                                                                 |
|    |                                 | Ultrapure water: 68.3 mL                                                                                                      |
|    |                                 | Mobile phase: 4.42 mL                                                                                                         |
|    |                                 | Total: 132.72 mL                                                                                                              |

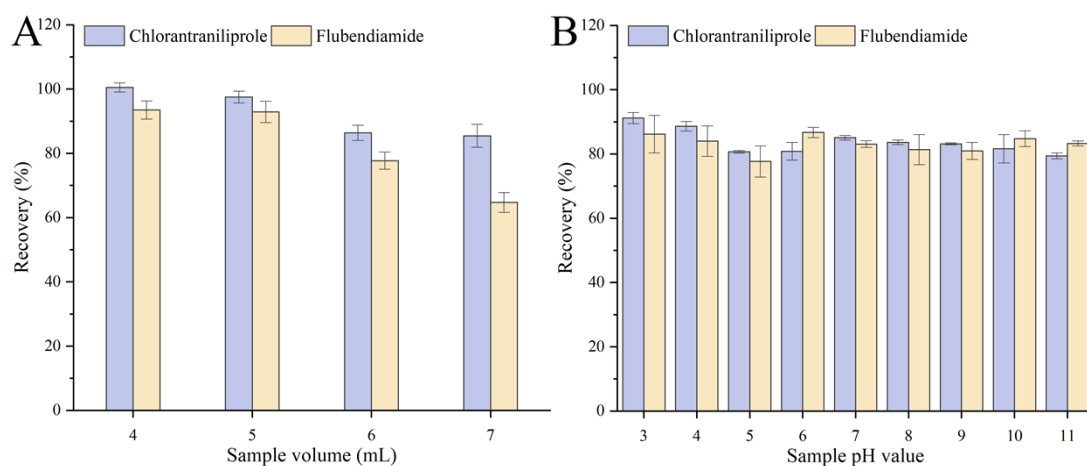

Fig. S1. Optimization of BDS-ADLLME Parameters. The figure presents the optimization of two key BDS-ADLLME parameters: (A) sample volume and (B) sample pH value. All other experimental conditions were held constant as follows: eucalyptol was used as the extractant; the extractant and dispersant volume ratio was 1:6; the total volume of extractant and dispersant was 1000  $\mu\text{L}$ ; 5 mixing cycles were employed; mixing speed was set at 430  $\mu\text{L s}^{-1}$ ; sample volume was varied (A) or set at 5 mL (B); and no salt or pH buffer was added.

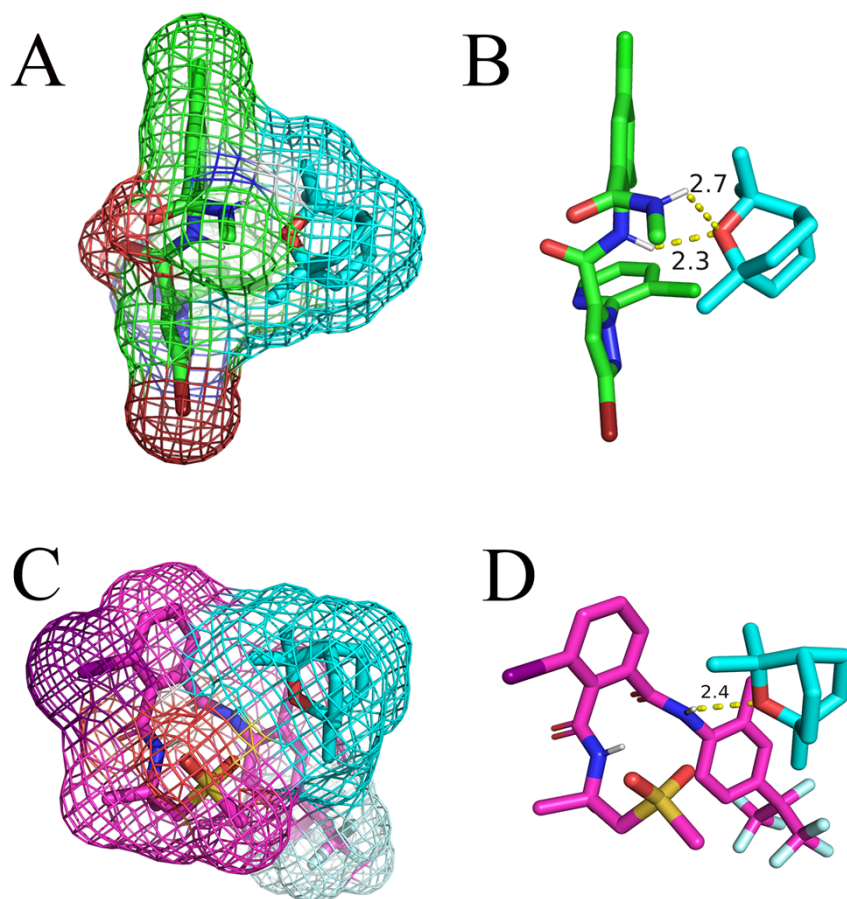

**Fig. S2.** Molecular docking results of eucalyptol with chlorantraniliprole and flubendiamide. (A) electron density distribution, and (B) binding mode of eucalyptol with chlorantraniliprole, (C) electron density distribution, and (D) binding mode of eucalyptol with flubendiamide.

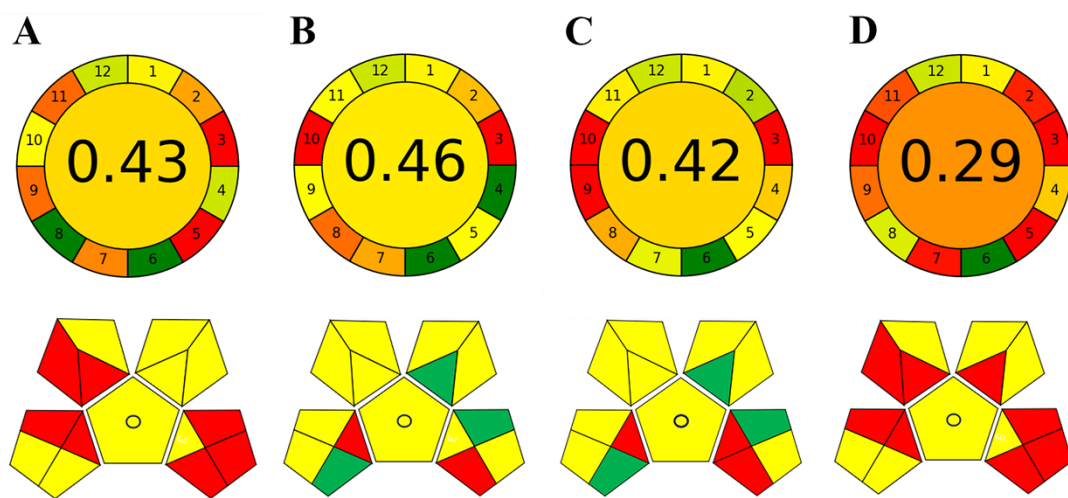

**Fig. S3.** Green assessment of the method mentioned in method comparison by using AGREE and GAPI. (A) the QuEChERS method. (B) the MSPE method. (C) the dSPE method. (D) the SPE method.
